# Supplementary material for: A Preclinical Trial and Molecularly Annotated Patient Cohort Identify Predictive Biomarkers in Homologous Recombination–deficient Pancreatic Cancer
Source: Oxford University Press journal article supplement (doi:10.1158/1078-0432.ccr-20-1439), 2020-08-14
Supplement: 10780432ccr201439-sup-241452_2_supp_6446395_qdwgns.pdf [file 10780432ccr201439-sup-241452_2_supp_6446395_qdwgns.pdf]

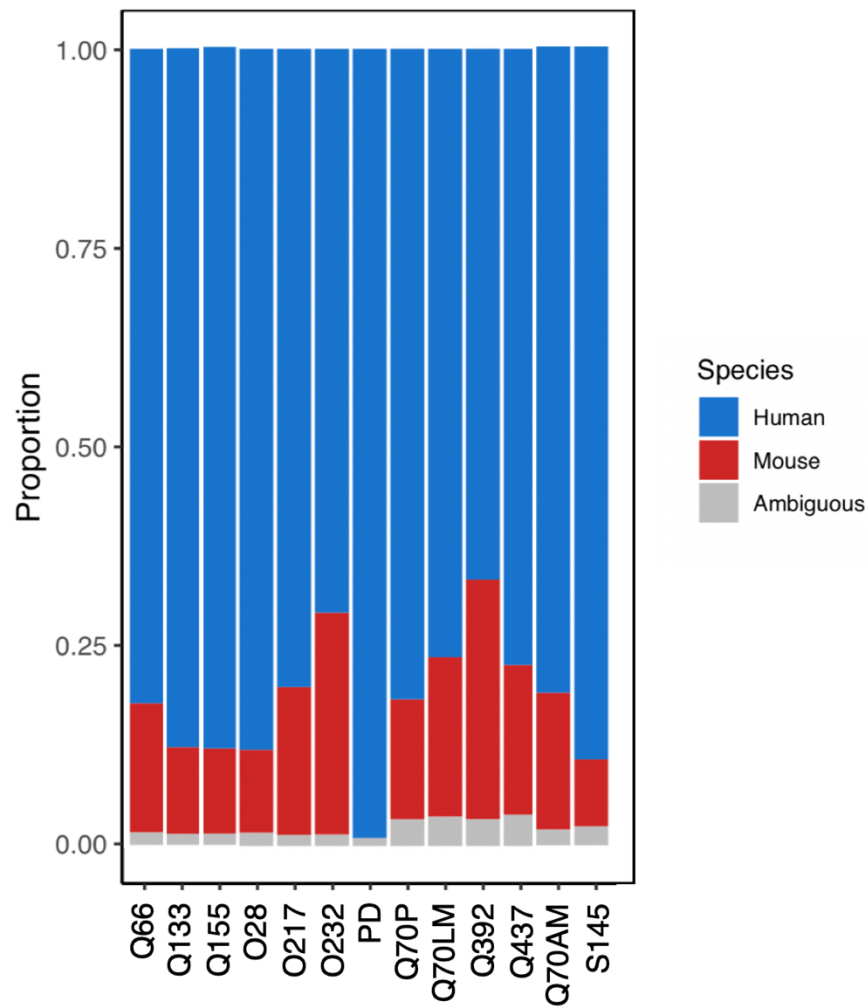

**Supplementary Figure 1. Results of the Disambiguate algorithm used to assign the PDAC xenograft RNAseq reads to individual species.** As a proof of principle, a normal human pancreatic duct sample (PD) was sequenced alongside the xenograft samples. The Disambiguate algorithm did not call any mouse reads for this human sample.
